# Supplementary material
Source: PubMed Central journal article supplement (PMC3780847)
Supplement: 1311010110_pnas.201311010SI.pdf [file 1311010110_pnas.201311010SI.pdf]

# Supporting Information

Kinkelin et al. 10.1073/pnas.1311010110

## SI Materials and Methods

**Protein Preparation.** *Saccharomyces cerevisiae* 12-subunit RNA polymerase (Pol) II was prepared as described previously (1). Full-length Bye1 was cloned into pOPINF with an N-terminal hexahistidine tag and expressed in *Escherichia coli* BL21 (DE3) (Novagen). The culture was grown in lysogeny broth (LB) medium at 37 °C until an OD<sub>600</sub> of 0.9 was reached, induced with 0.25 mM isopropyl β-D-1-thiogalactopyranoside (IPTG), and grown for 18 h at 20 °C. Cells were collected by centrifugation and flash-frozen. Protein was purified by nickel affinity, anion exchange, and size-exclusion chromatography. Cells were lysed by sonication in buffer A [20 mM Tris, pH 7.5, 100 mM NaCl, 10 μM ZnCl<sub>2</sub>, 10% (vol/vol) glycerol, and 5 mM DTT, supplemented with 20 mM imidazole, 1 U/μL DNase (Fermentas) and 1× protease inhibitors (100× stock: 1.42 mg leupeptin, 6.85 mg pepstatin A, 850 mg PMSF, and 1,650 mg benzamidine in 50 mL ethanol)]. After centrifugation at 16,000 × g for 20 min, the cleared lysate was applied to a preequilibrated (buffer A) Ni-nitrilotriacetic acid (NTA) agarose column (Qiagen). The column was washed with 10 column volumes of buffer A containing 20 mM imidazole before stepwise elution of the protein with buffer A containing 50/100/200 mM imidazole. Fractions containing Bye1 were pooled and applied to a MonoQ 10/100 GL column (GE Healthcare) equilibrated in buffer A. The protein was eluted with a linear gradient from 100 mM to 1 M NaCl [buffer B, 20 mM Tris, pH 7.5, 1 M NaCl, 10 μM ZnCl<sub>2</sub>, 10% (vol/vol) glycerol, and 5 mM DTT]. To remove any minor contaminants, a final size exclusion step using a Superdex 200 10/300 GL column (GE Healthcare) in 20 mM Tris, pH 7.5, 100 mM NaCl, 10 μM ZnCl<sub>2</sub>, 10% (vol/vol) glycerol, and 5 mM DTT was carried out. Selenomethionine-substituted Bye1 was grown in 2 L SelenoMet Base, 100 mL nutrient mix (Molecular Dimensions), and 80 mg selenomethionine (Acros Organics) at 37 °C until absorbance at 600 nm of 0.6. IPTG (0.5 mM), 50 mg selenomethionine, 100 mg lysine, threonine, and phenylalanine (Sigma-Aldrich), and 50 mg leucine, isoleucine, and valine (Sigma-Aldrich) was added per 2L culture, and the culture was grown for a further 18 h at 20 °C. Protein was purified as above. Bye1 TFIIS-like domain (TLD) (residues 225–370) was expressed as a larger variant (residues 69–370) containing a protease cleavage site at the N-terminal border of the TLD and cloned into pOPINI with an N-terminal hexahistidine tag. The protein was expressed and purified as above except that buffers did not contain glycerol, and the protein was eluted from the Ni-NTA column with 200 mM imidazole. After ion exchange purification, 300 μg precision protease was added, and cleavage was carried out overnight at 4 °C. To separate the cleavage products, the protein was applied to a preequilibrated (buffer A) Ni-NTA column. Bye1 TLD could be collected in the flow-through fraction and was then applied to size-exclusion chromatography using a Superdex 75 10/300 GL column.

**Surface Plasmon Resonance.** Approximately 2,500 resonance units of yeast Pol II were immobilized in immobilization buffer (Na-acetate, pH 5) on the surface of a biosensor CM5 chip (Biacore) using the amine coupling kit (Biacore) (2, 3). Full-length recombinant Bye1 was injected for 60 s at 10 μL/min in running buffer [5 mM Hepes (pH 7.25 at 20 °C), 40 mM (NH<sub>4</sub>)<sub>2</sub>SO<sub>4</sub>, 10 μM ZnCl<sub>2</sub>, 5 mM DTT, and 0.005% P20] at different concentrations (19 nM to 20 μM). The complex was allowed to dissociate for 5 min between injections. Affinity was measured for three independent dilution series. Raw data were corrected for the bulk signal from buffer and by identical injection through

a flow cell in which no Pol II was immobilized. Data were analyzed with BIAevaluation software (Biacore).

**Crystallization and X-Ray Structure Determination.** Complexes of Pol II and Bye1 were formed by incubating Pol II with a 10-fold molar amount of Bye1 at 4 °C overnight. For the elongation complex (EC) and the arrested complex (AC), purified Pol II (3.5 mg/mL) was mixed with a twofold molar excess of template (EC template, see ref. 4; AC template, see ref. 5) prepared as described previously (6), 8 mM magnesium chloride, and 2 mM cytidine 5'-triphosphate (CTD) (AC), and incubated for 1 h (EC) or 2 h (AC) at 20 °C before crystallization by vapor diffusion with 5–7% (wt/vol) PEG 6000, 200 mM ammonium acetate, 300 mM sodium acetate, 50 mM Hepes, pH 7.0, and 5 mM tris(2-carboxyethyl) phosphine hydrochloride (TCEP) as reservoir solution. Crystals were grown for 5–10 d and cryo-protected in mother solution supplemented with 22% (vol/vol) glycerol and containing 4 μM tailed template, 2 mM CTP, and 8 mM magnesium chloride (AC), followed by overnight incubation at 8 °C before harvesting and freezing in liquid nitrogen. Bye1 TLD or SeMet-substituted Bye1 TLD was added to the cryo-protectant at 1 mg/mL, and crystals were incubated overnight at 8 °C. For complexes containing α,β-Methyleneadenosine 5'-triphosphate (AMPCPP), Pol II was cocrystallized with nucleic acids in the presence of 8 mM magnesium chloride and was soaked with 2 mM AMPCPP in all cryo-protectant solutions. For cocrystallization of full-length Pol II and Bye1, purified Pol II (3.5 mg/mL) was mixed with a 10-fold molar excess of recombinant Bye1 and incubated overnight at 4 °C before crystallization by vapor diffusion with 750 mM tri-Na-citrate and 100 mM Hepes, pH 7.5, as the reservoir solution. Crystals were grown for 13 d and cryo-protected in 22% (vol/vol) glycerol, followed by 1-h incubation before harvesting and flash-freezing in liquid nitrogen. Diffraction data were collected at 100 K at beamline X06SA of the Swiss Light Source. Data were collected at 0.91887 Å, the K-absorption peak of bromine, and 0.9797 Å, the K-absorption peak of selenium. Structures were solved with molecular replacement using BUSTER (7) and the structure of 12-subunit Pol II (1WCM) as a search model. Refinement was performed using iterative cycles of model building in COOT (8) and restrained refinement in BUSTER.

**Chromatin Fractionation.** Strains used in yeast chromatin fractionation were derived from W303. Plasmids containing hemagglutinin (HA)-tagged, full-length Bye1, Bye1 ΔPHD (Δ1–177), and Bye1 ΔTLD (Δ177–354) (obtained from S. D. Hanes, Division of Infectious Disease, Wadsworth Center, New York State Department of Health, Albany, New York) (9) were transformed into WT yeast. Chromatin fractionation was performed using a combination of previously described methods (10, 11). Cells were grown in yeast extract peptone dextrose (YPD) from a starting OD<sub>600</sub> of 0.25 to mid-log phase (OD<sub>600</sub> ~ 1.0). Forty OD<sub>600</sub> units of cells were harvested by centrifugation and resuspended in 10 mL of sterile water. Following another round of centrifugation, cells were resuspended in 10 mL spheroplasting buffer (SB) (1 M sorbitol, 20 mM Tris, pH 7.4), collected by centrifugation, and stored at –80 °C overnight. The cell pellets were then thawed on ice, resuspended in 1.5 mL pre-SB (20 mM Tris, pH 7.4, 2 mM EDTA, 100 mM NaCl, and 10 mM 2-mercaptoethanol), and transferred to a 2-mL microcentrifuge tube. Cells were allowed to mix for 10 min at room temperature on a rotating shaker. Cells were pelleted by a flash spin

in a microcentrifuge, and the buffer was aspirated. Cell pellets were washed briefly in 1.5 mL SB buffer and quickly centrifuged as before. The pellet was resuspended in 1 mL SB buffer, and 125  $\mu$ L of 10 mg/mL Zymolyase 20T (Seikagaku Biobusiness) in SB buffer was added. The mixture was incubated at room temperature for 30–60 min on a rotating shaker. The spheroplasting progress was assessed by addition of 10  $\mu$ L of cells to 1 mL 1% SDS and vortexing, followed by measuring the OD<sub>600</sub> of the liquid. Once the OD<sub>600</sub> measurement decreased by more than 80% of the starting value, spheroplasting was stopped with ice-cold SB buffer. Spheroplasts were pelleted at 300  $\times$  g for 5 min at 4 °C in a chilled microcentrifuge. The buffer was removed, and the pellet was gently resuspended in 1 mL lysis buffer (LB) (0.4 M sorbitol, 150 mM potassium acetate, 2 mM magnesium acetate, 20 mM Pipes-KOH, pH 6.8, 1  $\mu$ g/mL leupeptin, 1  $\mu$ g/mL pepstatin, 1  $\mu$ g/mL aprotinin, and 1 mM PMSF) and pelleted as above. The LB buffer wash step was repeated. To lyse the cells, the pellet was gently resuspended in 250  $\mu$ L LB with 1% Triton X-100, transferred to a 1.5-mL microcentrifuge tube, and incubated on ice for 10 min with occasional gentle mixing. Following lysis, 125  $\mu$ L was removed for the whole cell extract (WCE), and the remainder was centrifuged at 5,000  $\times$  g for 15 min at 4 °C. The supernatant was collected as the soluble fraction. The chromatin pellet was washed once by resuspension in 125  $\mu$ L of LB buffer with 1% Triton X-100 and spun as in the previous step. The supernatant was discarded, and the chromatin pellet was resuspended in 125  $\mu$ L of LB buffer with 1% Triton X-100. All samples were normalized to total protein content of WCE as determined using Bradford reagent (Bio-Rad). Normalized WCE and volume equivalents of the soluble and chromatin fractions were boiled in 1 $\times$  SDS loading buffer, separated by 15% SDS/PAGE, and analyzed by immunoblotting with antibodies HA (MMS-101R; Covance), 1:1,000; histone 4 (H4; 05-858; Millipore), 1:1,000; and glucose-6-phosphate-1-dehydrogenase (G6DH; A9521; Sigma), 1:100,000.

**Histone Peptide Microarrays.** Full-length *Bye1* (residues 1–594) and *Bye1* PHD (residues 47–134) were expressed as glutathione S-transferase (GST)-fusions from exponentially growing (OD<sub>600</sub> ~0.6) BL21 RIL cells by overnight induction with 0.4 mM IPTG at 16 °C. Cells were lysed by sonication in cold 1 $\times$  PBS, pH 7.6, containing 1 mM (PHD) or 5 mM (full-length) DTT, 1 mM PMSF, 1 mM ZnSO<sub>4</sub>, and 10% (vol/vol) glycerol (full-length only). Proteins

were captured on GST-Bind Resin (Novagen) and eluted in buffer containing 50 mM Tris-HCl, pH 8.0, and 10 mM glutathione. Proteins were dialyzed into buffer containing 20 mM Tris-HCl, pH 8.0, 150 mM NaCl, and 1 mM DTT before microarray hybridization. Peptide synthesis and validation, microarray fabrication, effector protein hybridization and detection, and data analysis were performed essentially as described previously (12). Briefly, biotinylated histone peptides (Table S2) were printed on streptavidin-coated glass slides at high density (each peptide printed 24 times per array). GST-fusion proteins were hybridized overnight on the array at a final concentration of 1.6  $\mu$ M. Bound protein was labeled with  $\alpha$ -GST (Sigma) and  $\alpha$ -AlexaFluor 647 (Invitrogen) antibodies, and interactions were visualized with a Typhoon Trio+ scanner (GE). Densitometry measurements were acquired using ImageQuant TL (GE).

**Synthetic Lethality Screen.** Strains used to validate candidates from the synthetic lethality screens were derived from BY4741. Synthetic genetic array analysis was performed as described previously (13, 14). Briefly, strain BY5563 *bye1* $\Delta$  was crossed to the complete KO library of nonessential genes (15). After sporulation and selection for the respective double KO, the latter was screened for viability. The screen was performed on a Beckman-Coulter Biomek FX.

**In Vitro Transcription Assay.** Nuclear extracts of *BY4741* and *bye1* $\Delta$  were prepared from 3 L of yeast culture as described previously (16, 17). Activator-dependent in vitro transcription assays were carried out using 150 ng of recombinant full-length *Gcn4* (18) and addition of recombinant *Bye1*. The transcript was detected by primer extension using the 5'-Cy5-labeled oligonucleotide 5'-TTCACCAGTGAGACGGCAAC-3' (16). The resulting gel was scanned on a typhoon scanner FLA9400, and data were analyzed with ImageQuant Software (GE Healthcare).

**RNA Extension Assay.** RNA extension assays were carried out as described previously (19). All samples were incubated overnight at 4 °C before addition of nucleoside triphosphates (NTPs) to allow complex formation of Pol II and *Bye1*.

**ChIP and Gene Averaged Profiles.** ChIP and generation of gene averaged profiles was carried out as described previously (20–22).

- Sydow JF, et al. (2009) Structural basis of transcription: Mismatch-specific fidelity mechanisms and paused RNA polymerase II with frayed RNA. *Mol Cell* 34(6):710–721.
- Johnsson B, Löfås S, Lindquist G (1991) Immobilization of proteins to a carboxymethyl-dextran-modified gold surface for biospecific interaction analysis in surface plasmon resonance sensors. *Anal Biochem* 198(2):268–277.
- Löfås S, Johnsson B (1990) A novel hydrogel matrix on gold surfaces in surface plasmon resonance sensors for fast and efficient covalent immobilization of ligands. *J Chem Soc* 21:1526–1528.
- Cheung AC, Sainsbury S, Cramer P (2011) Structural basis of initial RNA polymerase II transcription. *EMBO J* 30(23):4755–4763.
- Cheung AC, Cramer P (2011) Structural basis of RNA polymerase II backtracking, arrest and reactivation. *Nature* 471(7337):249–253.
- Kettenberger H, Armache KJ, Cramer P (2004) Complete RNA polymerase II elongation complex structure and its interactions with NTP and TFIIIS. *Mol Cell* 16(6):955–965.
- Bricogne G, et al. (2012) *BUSTER Version 2.11.5* (Global Phasing, Cambridge).
- Emsley P, Lohkamp B, Scott WG, Cowtan K (2010) Features and development of Coot. *Acta Crystallogr D Biol Crystallogr* 66(Pt 4):486–501.
- Wu X, Rossetini A, Hanes SD (2003) The E551 prolyl isomerase and its suppressor *BYE1* interact with RNA pol II to inhibit transcription elongation in *Saccharomyces cerevisiae*. *Genetics* 165(4):1687–1702.
- Donovan S, Harwood J, Drury LS, Diffley JF (1997) Cdc6p-dependent loading of Mcm proteins onto pre-replicative chromatin in budding yeast. *Proc Natl Acad Sci USA* 94(11):5611–5616.
- Keogh MC, et al. (2006) A phosphatase complex that dephosphorylates gammaH2AX regulates DNA damage checkpoint recovery. *Nature* 439(7075):497–501.
- Rothbart SB, Krajewski K, Strahl BD, Fuchs SM (2012) Peptide microarrays to interrogate the “histone code”. *Methods Enzymol* 512:107–135.
- Tong AH, et al. (2001) Systematic genetic analysis with ordered arrays of yeast deletion mutants. *Science* 294(5550):2364–2368.
- Tong AH, et al. (2004) Global mapping of the yeast genetic interaction network. *Science* 303(5659):808–813.
- Giaever G, et al. (2002) Functional profiling of the *Saccharomyces cerevisiae* genome. *Nature* 418(6896):387–391.
- Seizl M, Larivière L, Pfaffeneder T, Wenzek L, Cramer P (2011) Mediator head subcomplex Med11/22 contains a common helix bundle building block with a specific function in transcription initiation complex stabilization. *Nucleic Acids Res* 39(14):6291–6304.
- Ranish JA, Yudkovsky N, Hahn S (1999) Intermediates in formation and activity of the RNA polymerase II preinitiation complex: Holoenzyme recruitment and a postrecruitment role for the TATA box and TFIIIB. *Genes Dev* 13(1):49–63.
- Seizl M, et al. (2011) A conserved GA element in TATA-less RNA polymerase II promoters. *PLoS ONE* 6(11):e27595.
- Damsma GE, Alt A, Brueckner F, Carell T, Cramer P (2007) Mechanism of transcriptional stalling at cisplatin-damaged DNA. *Nat Struct Mol Biol* 14(12):1127–1133.
- Mayer A, et al. (2010) Uniform transitions of the general RNA polymerase II transcription complex. *Nat Struct Mol Biol* 17(10):1272–1278.
- Fan X, Lamarre-Vincent N, Wang Q, Struhl K (2008) Extensive chromatin fragmentation improves enrichment of protein binding sites in chromatin immunoprecipitation experiments. *Nucleic Acids Res* 36(19):e125.
- Aparicio O, et al. (2005) Chromatin immunoprecipitation for determining the association of proteins with specific genomic sequences in vivo. *Current Protocols in Molecular Biology*, ed Ausubel FM, et al. February; Chapter 21:Unit 21.3.



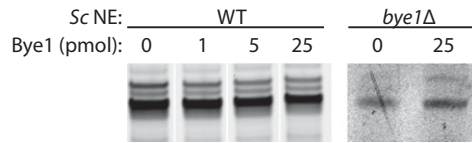

**Fig. S3.** Transcriptional activity of Bye1-depleted nuclear extracts. Transcriptional activities of WT and Bye1-depleted (*bye1Δ*) nuclear extracts (NE) in an in vitro transcription assay using a nucleosome-free DNA template. For experimental procedures, see *SI Materials and Methods*.

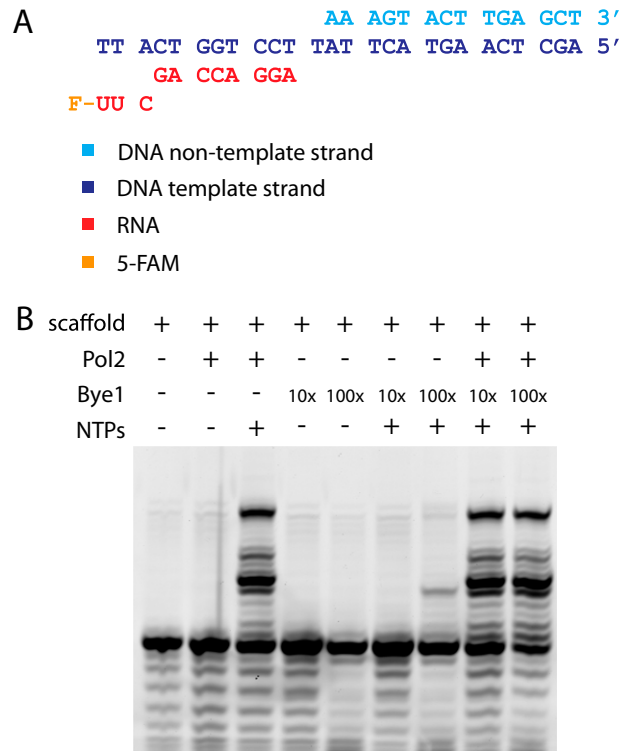

**Fig. S4.** Effect of Bye1 on Pol II elongation in vitro. (A) Nucleic acid scaffold for reconstitution of Pol II EC. (B) Gel electrophoresis separation of RNA products obtained in RNA extension assay. For experimental procedures, see *SI Materials and Methods*.



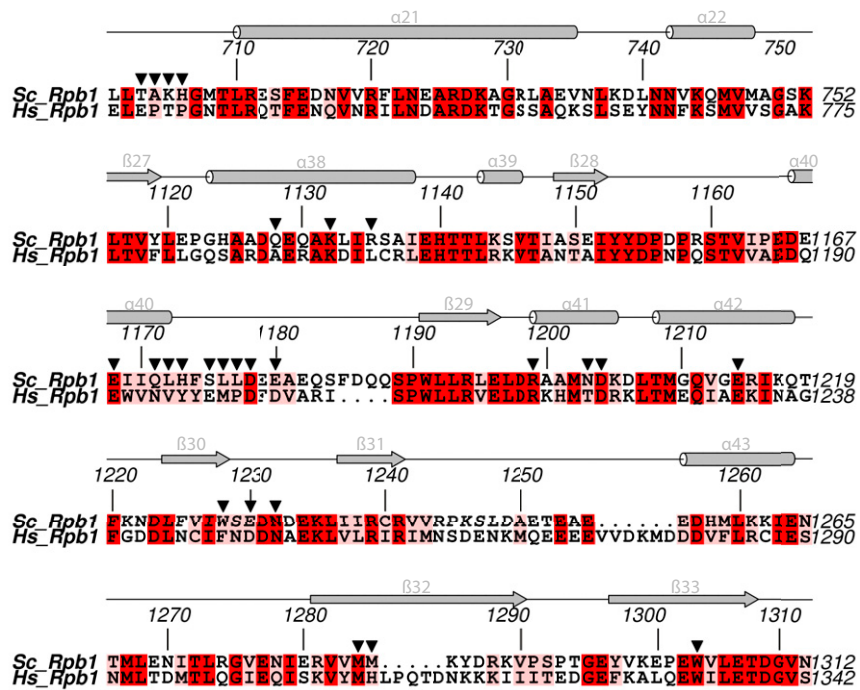

**Fig. S6.** Conservation of the Pol II-Bye1 interface in human homologs. Amino acid sequence alignments of *S. cerevisiae* Rpb1 and *Homo sapiens* Rpb1. Secondary structure elements are indicated as arrows ( $\beta$ -strands) or rods ( $\alpha$ -helices). Loops are indicated with solid lines. Residues that are part of the Pol II-Bye1 interface are marked with black triangles.

**Table S1.** Diffraction data and refinement statistics

| PDB ID                 | Pol II-Bye1 (4bxx)             | Pol II EC-Bye1 TLD (4by7)      | Pol II EC-Bye1 TLD + AMPCPP (4by1) | Arrested Pol II-Bye1 TLD (4bxx) |
|------------------------|--------------------------------|--------------------------------|------------------------------------|---------------------------------|
| <b>Data collection</b> |                                |                                |                                    |                                 |
| Space group            | C222 <sub>1</sub>              | C222 <sub>1</sub>              | C222 <sub>1</sub>                  | C222 <sub>1</sub>               |
| Unit cell axes (Å)     | 220.55<br>392.09<br>279.80     | 222.50<br>390.68<br>281.97     | 222.24<br>391.58<br>281.02         | 222.92<br>392.67<br>281.04      |
| Unit cell angle (°)    | $\alpha = \beta = \gamma = 90$ | $\alpha = \beta = \gamma = 90$ | $\alpha = \beta = \gamma = 90$     | $\alpha = \beta = \gamma = 90$  |
| Resolution range (Å)   | 49.63–4.80 (4.92–4.80)         | 48.84–3.15 (3.23–3.15)         | 48.95–3.60 (3.69–3.60)             | 49.08–3.28 (3.37–3.28)          |
| Unique reflections     | 59,394 (4,352)                 | 210,346 (15,471)               | 141,065 (10,391)                   | 187,168 (13,766)                |
| Completeness (%)       | 99.97 (100)                    | 99.98 (100)                    | 99.98 (100)                        | 99.98 (99.98)                   |
| Redundancy             | 7.50 (7.82)                    | 7.66 (7.74)                    | 7.62 (7.61)                        | 7.66 (7.49)                     |
| $R_{\text{sym}}$ (%)   | 40.9 (173.0)                   | 11.6 (165.2)                   | 21.2 (193.4)                       | 12.9 (185.4)                    |
| $I/\sigma(I)$          | 6.05 (1.24)                    | 15.97 (1.60)                   | 9.95 (1.57)                        | 14.66 (1.52)                    |
| CC(1/2)                | 98.5 (60.8)                    | 99.8 (63.2)                    | 99.6 (56.3)                        | 99.8 (67.1)                     |
| <b>Refinement</b>      |                                |                                |                                    |                                 |
| Non-H atoms            | 31,510                         | 33,261                         | 33,026                             | 32,753                          |
| B-factor (mean)        | 199.00                         | 115.07                         | 125.08                             | 120.50                          |
| Rmsd bonds             | 0.010                          | 0.010                          | 0.009                              | 0.010                           |
| Rmsd angles            | 1.33                           | 1.22                           | 1.21                               | 1.29                            |
| $R_{\text{cryst}}$ (%) | 19.06                          | 18.94                          | 17.49                              | 17.98                           |
| $R_{\text{free}}$ (%)  | 25.27                          | 21.19                          | 20.62                              | 20.77                           |

Values in parentheses are for the highest resolution shell. All data were collected with a radiation wavelength of 0.9188 Å.

**Table S2. List of microarrayed peptides**

| Peptide no. | Residue range | Sequence                                                                                                                                         | Annotation                                     |
|-------------|---------------|--------------------------------------------------------------------------------------------------------------------------------------------------|------------------------------------------------|
| P1          | H3 1–20       | AR <sup>2</sup> TK <sup>4</sup> QTAR <sup>8</sup> K <sup>5</sup> 10 <sup>T</sup> GGK <sup>14</sup> APRK <sup>18</sup> QL-K(Biot)-NH <sub>2</sub> | H3 (1–20)                                      |
| P2          | H3 1–20       | ARTKQTARKSTGGK(Ac)APRKQL-K(Biot)-NH <sub>2</sub>                                                                                                 | H3K14ac                                        |
| P3          | H3 1–20       | ARTKQTARK(Ac)STGGKAPRKQL-K(Biot)-NH <sub>2</sub>                                                                                                 | H3K9ac                                         |
| P4          | H3 1–20       | ARTK(Ac)QTARKSTGGKAPRKQL-K(Biot)-NH <sub>2</sub>                                                                                                 | H3K4ac                                         |
| P5          | H3 1–20       | ARTK(Ac)QTARKSTGGK(Ac)APRKQL-K(Biot)-NH <sub>2</sub>                                                                                             | H3K4ac + K14ac                                 |
| P6          | H3 1–20       | ARTKQTARK(Ac)STGGK(Ac)APRKQL-K(Biot)-NH <sub>2</sub>                                                                                             | H3K9ac + K14ac                                 |
| P7          | H3 1–20       | ARTK(Ac)QTARK(Ac)STGGKAPRKQL-K(Biot)-NH <sub>2</sub>                                                                                             | H3K4ac + K9ac                                  |
| P8          | H3 1–20       | ARTK(Ac)QTARK(Ac)STGGK(Ac)APRKQL-K(Biot)-NH <sub>2</sub>                                                                                         | H3K4ac + K9ac + K14ac                          |
| P10         | H3 1–20       | ARTKQTARKSTGGKAPRK(Ac)QL-K(Biot)-NH <sub>2</sub>                                                                                                 | H3K18ac                                        |
| P11         | H3 1–20       | ARTKQTARKSTGGK(Ac)APRK(Ac)QL-K(Biot)-NH <sub>2</sub>                                                                                             | H3K14ac + K18ac                                |
| P12         | H3 1–20       | ARTKQTARK(Ac)STGGKAPRK(Ac)QL-K(Biot)-NH <sub>2</sub>                                                                                             | H3K9ac + K18ac                                 |
| P13         | H3 1–20       | ARTK(Ac)QTARKSTGGKAPRK(Ac)QL-K(Biot)-NH <sub>2</sub>                                                                                             | H3K4ac + K18ac                                 |
| P14         | H3 1–20       | ARTKQTARK(Ac)STGGK(Ac)APRK(Ac)QL-K(Biot)-NH <sub>2</sub>                                                                                         | H3K9ac + K14ac + K18ac                         |
| P15         | H3 1–20       | ARTK(Ac)QTARKSTGGK(Ac)APRK(Ac)QL-K(Biot)-NH <sub>2</sub>                                                                                         | H3K4ac + K14ac + K18ac                         |
| P16         | H3 1–20       | ARTK(Ac)QTARK(Ac)STGGKAPRK(Ac)QL-K(Biot)-NH <sub>2</sub>                                                                                         | H3K4ac + K9ac + K18ac                          |
| P17         | H3 1–20       | ARTK(Ac)QTARK(Ac)STGGK(Ac)APRK(Ac)QL-K(Biot)-NH <sub>2</sub>                                                                                     | H3K4ac + K9ac + K14ac + K18ac                  |
| P18         | H3 1–20       | ARTK(Me <sub>3</sub> )QTARKSTGGKAPRKQL-K(Biot)-NH <sub>2</sub>                                                                                   | H3K4me3                                        |
| P19         | H3 1–20       | ARTK(Me <sub>3</sub> )QTARK(Ac)STGGKAPRKQL-K(Biot)-NH <sub>2</sub>                                                                               | H3K4me3 + K9ac                                 |
| P20         | H3 1–20       | ARTK(Me <sub>3</sub> )QTARKSTGGK(Ac)APRKQL-K(Biot)-NH <sub>2</sub>                                                                               | H3K4me3 + K14ac                                |
| P21         | H3 1–20       | ARTK(Me <sub>3</sub> )QTARKSTGGKAPRK(Ac)QL-K(Biot)-NH <sub>2</sub>                                                                               | H3K4me3 + K18ac                                |
| P22         | H3 1–20       | ARTK(Me <sub>3</sub> )QTARK(Ac)STGGK(Ac)APRKQL-K(Biot)-NH <sub>2</sub>                                                                           | H3K4me3 + K9ac + K14ac                         |
| P23         | H3 1–20       | ARTK(Me <sub>3</sub> )QTARK(Ac)STGGKAPRK(Ac)QL-K(Biot)-NH <sub>2</sub>                                                                           | H3K4me3 + K9ac + K18ac                         |
| P24         | H3 1–20       | ARTK(Me <sub>3</sub> )QTARKSTGGK(Ac)APRK(Ac)QL-K(Biot)-NH <sub>2</sub>                                                                           | H3K4me3 + K14ac + K18ac                        |
| P25         | H3 1–20       | ARTK(Me <sub>3</sub> )QTARK(Ac)STGGK(Ac)APRK(Ac)QL-K(Biot)-NH <sub>2</sub>                                                                       | H3K4me3 + K9ac + K14ac + K18ac                 |
| P26         | H3 1–20       | ArpTK(Me <sub>3</sub> )QTARK(Ac)STGGK(Ac)APRK(Ac)QL-K(Biot)-NH <sub>2</sub>                                                                      | H3T3p + K4me3 + K9ac + K14ac + K18ac           |
| P27         | H3 1–20       | ArpTK(Me <sub>3</sub> )QTARKSTGGKAPRKQL-K(Biot)-NH <sub>2</sub>                                                                                  | H3T3p + K4me3                                  |
| P28         | H3 1–20       | AR(Me <sub>2</sub> a)pTK(Me <sub>3</sub> )QTARK(Ac)STGGK(Ac)APRK(Ac)QL-K(Biot)-NH <sub>2</sub>                                                   | H3R2me2a + T3p + K4me3 + K9ac + K14ac + K18ac  |
| P29         | H3 1–20       | AR(Me <sub>2</sub> a)pTK(Me <sub>3</sub> )QTARKSTGGKAPRKQL-K(Biot)-NH <sub>2</sub>                                                               | H3R2me2a + T3p + K4me3                         |
| P30         | H3 1–20       | AR(Me <sub>2</sub> a)TK(Me <sub>3</sub> )QTARKSTGGKAPRKQL-K(Biot)-NH <sub>2</sub>                                                                | H3R2me2a + K4me3                               |
| P32         | H3 1–20       | ARTK(Me <sub>2</sub> )QTARKSTGGKAPRKQL-K(Biot)-NH <sub>2</sub>                                                                                   | H3K4me2                                        |
| P33         | H3 1–20       | ARTK(Me <sub>2</sub> )QTARK(Ac)STGGK(Ac)APRK(Ac)QL-K(Biot)-NH <sub>2</sub>                                                                       | H3K4me2 + K9ac + K14ac + K18ac                 |
| P34         | H3 1–20       | ARTK(Me <sub>2</sub> )QTARKSTGGKAPRKQL-K(Biot)-NH <sub>2</sub>                                                                                   | H3K4me1                                        |
| P35         | H3 1–20       | ARTK(Me <sub>2</sub> )QTARK(Ac)STGGK(Ac)APRK(Ac)QL-K(Biot)-NH <sub>2</sub>                                                                       | H3K4me1 + K9ac + K14ac + K18ac                 |
| P36         | H3 1–20       | ARTKQTARKpSTGGKAPRKQL-K(Biot)-NH <sub>2</sub>                                                                                                    | H3S10p                                         |
| P37         | H3 1–20       | ARTK(Ac)QTARK(Ac)pSTGGK(Ac)APRK(Ac)QL-K(Biot)-NH <sub>2</sub>                                                                                    | H3K4ac + K9ac + S10p + K14ac + K18ac           |
| P38         | H3 1–20       | ARTK(Me <sub>3</sub> )QTARKpSTGGKAPRKQL-K(Biot)-NH <sub>2</sub>                                                                                  | H3K4me3 + S10p                                 |
| P39         | H3 1–20       | ARTK(Me <sub>3</sub> )QTARK(Ac)pSTGGK(Ac)APRK(Ac)QL-K(Biot)-NH <sub>2</sub>                                                                      | H3K4me3 + K9ac + S10p + K14ac + K18ac          |
| P40         | H3 1–20       | AR(Me <sub>2</sub> a)TK(Me <sub>3</sub> )QTARKpSTGGKAPRKQL-K(Biot)-NH <sub>2</sub>                                                               | H3R2me2a + K4me3 + S10p                        |
| P41         | H3 1–20       | AR(Me <sub>2</sub> a)TK(Me <sub>3</sub> )QTARK(Ac)pSTGGK(Ac)APRK(Ac)QL-K(Biot)-NH <sub>2</sub>                                                   | H3R2me2a + K4me3 + K9ac + S10p + K14ac + K18ac |
| P42         | H3 1–20       | ARTKQTARK(Me <sub>3</sub> )STGGKAPRKQL-K(Biot)-NH <sub>2</sub>                                                                                   | H3K9me3                                        |
| P43         | H3 1–20       | ARTK(Ac)QTARK(Me <sub>3</sub> )STGGK(Ac)APRK(Ac)QL-K(Biot)-NH <sub>2</sub>                                                                       | H3K4ac + K9me3 + K14ac + K18ac                 |
| P44         | H3 1–20       | ARTK(Me <sub>2</sub> )QTARK(Ac)STGGKAPRK(Ac)QL-K(Biot)-NH <sub>2</sub>                                                                           | H3K4me2 + K9ac + K18ac                         |
| P45         | H3 1–20       | ARTK(Me <sub>2</sub> )QTARK(Ac)STGGKAPRK(Ac)QL-K(Biot)-NH <sub>2</sub>                                                                           | H3K4me1 + K9ac + K18ac                         |
| P47         | H3 1–20       | AR(Me <sub>2</sub> a)TKQTARKSTGGKAPRKQL-K(Biot)-NH <sub>2</sub>                                                                                  | H3R2me2a                                       |
| P48         | H3 1–20       | AR(Me <sub>2</sub> a)TK(Ac)QTARK(Ac)STGGK(Ac)APRK(Ac)QL-K(Biot)-NH <sub>2</sub>                                                                  | H3R2me2a + K4ac + K9ac + K14ac + K18ac         |
| P50         | H3 1–20       | AR(Me <sub>2</sub> a)TK(Me <sub>3</sub> )QTARK(Ac)STGGK(Ac)APRK(Ac)QL-K(Biot)-NH <sub>2</sub>                                                    | H3R2me2a + K4me3 + K9ac + K14ac + K18ac        |
| P51         | H3 1–20       | AR(Me)TK(Me <sub>3</sub> )QTARKSTGGKAPRKQL-K(Biot)-NH <sub>2</sub>                                                                               | H3R2me1 + K4me3                                |
| P52         | H3 1–20       | AR(Me)TK(Me <sub>3</sub> )QTARK(Ac)STGGK(Ac)APRK(Ac)QL-K(Biot)-NH <sub>2</sub>                                                                   | H3R2me1 + K4me3 + K9ac + K14ac + K18ac         |
| P53         | H3 1–20       | ACitTKQTARKSTGGKAPRKQL-K(Biot)-NH <sub>2</sub>                                                                                                   | H3Cit2                                         |
| P54         | H3 1–20       | ACitTK(Me <sub>3</sub> )QTARKSTGGKAPRKQL-K(Biot)-NH <sub>2</sub>                                                                                 | H3Cit2 + K4me3                                 |
| P55         | H3 1–20       | ACitTK(Me <sub>3</sub> )QTARK(Ac)STGGK(Ac)APRK(Ac)QL-K(Biot)-NH <sub>2</sub>                                                                     | H3Cit2 + K4me3 + K9ac + K14ac + K18ac          |
| P56         | H3 1–20       | ACitTK(Ac)QTARK(Ac)STGGK(Ac)APRK(Ac)QL-K(Biot)-NH <sub>2</sub>                                                                                   | H3Cit2 + K4ac + K9ac + K14ac + K18ac           |
| P57         | H3 1–20       | ArpTKQTARKSTGGKAPRKQL-Peg-K(Biot)-NH <sub>2</sub>                                                                                                | H3T3p                                          |
| P58         | H4 1–23       | Ac-SGRGK <sup>5</sup> GGKGLGKGGAKRHRKVLR-Peg-Biot                                                                                                | H4 (1–23)                                      |
| P59         | H4 1–23       | Ac-SGRGK(Ac)GGK(Ac)GLGK(Ac)GGAK(Ac)RHRKVLR-Peg-Biot                                                                                              | H4K5ac + K8ac + K12ac + K16ac                  |
| P60         | H3 1–20       | AR(Me <sub>2</sub> a)TK(Me <sub>2</sub> )QTARKSTGGKAPRKQL-K(Biot)-NH <sub>2</sub>                                                                | H3R2me2a + K4me2                               |
| P61         | H3 1–20       | AR(Me <sub>2</sub> s)TK(Me <sub>2</sub> )QTARKSTGGKAPRKQL-K(Biot)-NH <sub>2</sub>                                                                | H3R2me2s + K4me2                               |
| P62         | H3 1–20       | AR(Me)TK(Me <sub>2</sub> )QTARKSTGGKAPRKQL-K(Biot)-NH <sub>2</sub>                                                                               | H3R2me1 + K4me2                                |
| P63         | H3 1–20       | ACitTK(Me <sub>2</sub> )QTARKSTGGKAPRKQL-K(Biot)-NH <sub>2</sub>                                                                                 | H3Cit2 + K4me2                                 |
| P66         | H4 1–23       | Ac-SGRGK(Ac)GGKGLGKGGAKRHRKVLR-Peg-Biot                                                                                                          | H4K5ac                                         |
| P67         | H4 1–23       | Ac-SGRGKGGK(Ac)GLGKGGAKRHRKVLR-Peg-Biot                                                                                                          | H4K8ac                                         |

Table S2. Cont.

| Peptide no. | Residue range | Sequence                                                                                                                           | Annotation                                     |
|-------------|---------------|------------------------------------------------------------------------------------------------------------------------------------|------------------------------------------------|
| P68         | H4 1–23       | Ac-SGRGKGGKGLGK(Ac)GGAKRHRKVLRL-Peg-Biot                                                                                           | H4K12ac                                        |
| P69         | H4 1–23       | Ac-SGRGKGGKGLGKGGAK(Ac)RHRKVLRL-Peg-Biot                                                                                           | H4K16ac                                        |
| P70         | H4 1–23       | Ac-SGRGK(Ac)GGKGLGK(Ac)GGAKRHRKVLRL-Peg-Biot                                                                                       | H4K5ac + K12ac                                 |
| P71         | H4 1–23       | Ac-SGRGKGGK(Ac)GLGKGGAK(Ac)RHRKVLRL-Peg-Biot                                                                                       | H4K8ac + K16ac                                 |
| P72         | H4 1–23       | Ac-SGRGK(Ac)GGK(Ac)GLGK(Ac)GGAKRHRKVLRL-Peg-Biot                                                                                   | H4K5ac + K8ac + K12ac                          |
| P73         | H4 1–23       | Ac-SGR(Me <sub>2</sub> a)GKGGKGLGKGGAKRHRKVLRL-K(Biot)-NH <sub>2</sub>                                                             | H4R3me2a                                       |
| P74         | H4 1–23       | Ac-SGR(Me <sub>2</sub> s)GKGGKGLGKGGAKRHRKVLRL-K(Biot)-NH <sub>2</sub>                                                             | H4R3me2s                                       |
| P75         | H4 1–23       | Ac-SGR(Me)GKGGKGLGKGGAKRHRKVLRL-K(Biot)-NH <sub>2</sub>                                                                            | H4R3me1                                        |
| P76         | H4 1–23       | Ac-pSGR(Me <sub>2</sub> a)GKGGKGLGKGGAKRHRKVLRL-K(Biot)-NH <sub>2</sub>                                                            | H4S1p + R3me2a                                 |
| P77         | H4 1–23       | Ac-pSGR(Me <sub>2</sub> s)GKGGKGLGKGGAKRHRKVLRL-K(Biot)-NH <sub>2</sub>                                                            | H4S1p + R3me2s                                 |
| P78         | H4 1–23       | Ac-pSGR(Me)GKGGKGLGKGGAKRHRKVLRL-K(Biot)-NH <sub>2</sub>                                                                           | H4S1p + R3me1                                  |
| P79         | H4 1–23       | Ac-SGR(Me <sub>2</sub> a)GK(Ac)GGK(Ac)GLGK(Ac)GGAK(Ac)RHRK(Ac)VLRL-K(Biot)-NH <sub>2</sub>                                         | H4R3me2a + K5ac + K8ac + K12ac + K16ac + K20ac |
| P80         | H4 1–23       | Ac-SGR(Me <sub>2</sub> s)GK(Ac)GGK(Ac)GLGK(Ac)GGAK(Ac)RHRK(Ac)VLRL-K(Biot)-NH <sub>2</sub>                                         | H4R3me2s + K5ac + K8ac + K12ac + K16ac + K20ac |
| P81         | H4 1–23       | Ac-SGR(Me)GK(Ac)GGK(Ac)GLGK(Ac)GGAK(Ac)RHRK(Ac)VLRL-K(Biot)-NH <sub>2</sub>                                                        | H4R3me1 + K5ac + K8ac + K12ac + K16ac + K20ac  |
| P82         | H4 11–27      | Ac-GKGGAKRHRK(Me <sub>3</sub> )VLRDNIQ-Peg-Biot                                                                                    | H4K20me3                                       |
| P83         | H4 11–27      | Ac-GKGGAKRHRK(Me <sub>2</sub> )VLRDNIQ-Peg-Biot                                                                                    | H4K20me2                                       |
| P84         | H4 11–27      | Ac-GKGGAKRHRK(Me)VLRDNIQ-Peg-Biot                                                                                                  | H4K20me1                                       |
| P85         | H4 11–27      | Ac-GK(Ac)GGAK(Ac)RHRK(Me <sub>3</sub> )VLRDNIQ-Peg-Biot                                                                            | H4K12ac + K16ac + K20me3                       |
| P86         | H4 11–27      | Ac-GK(Ac)GGAK(Ac)RHRK(Me <sub>2</sub> )VLRDNIQ-Peg-Biot                                                                            | H4K12ac + K16ac + K20me2                       |
| P89         | H3 1–20       | ARTK(Me <sub>3</sub> )QTAR(Me <sub>2</sub> s)K(Me <sub>3</sub> )STGGKAPRKQL-K(Biot)-NH <sub>2</sub>                                | H3K4me3 + R8me2s + K9me3                       |
| P90         | H3 15–43      | Ac-APRK <sup>18</sup> QLATK <sup>23</sup> AARK <sup>27</sup> SAPSTGGVK <sup>36</sup> K <sup>37</sup> PHRYGGK(Biot)-NH <sub>2</sub> | H3 (15–41)                                     |
| P91         | H3 15–43      | Ac-APRK(Me <sub>3</sub> )QLATKAARKSAPSTGGVKKPHRY-GG-K(Biot)-NH <sub>2</sub>                                                        | H3K18me3                                       |
| P93         | H3 15–43      | Ac-APRKQLATKAARKSAPSTGGVKK(Me <sub>3</sub> )KPHRY-GG-K(Biot)-NH <sub>2</sub>                                                       | H3K36me3                                       |
| P95         | H3 15–43      | Ac-APRK(Me <sub>3</sub> )QLATKAARKSAPSTGGVKK(Me <sub>3</sub> )KPHRY-GG-K(Biot)-NH <sub>2</sub>                                     | H3K18me3 + K36me3                              |
| P96         | H3 1–20       | ARTK(Me <sub>3</sub> )QTAR(Me <sub>2</sub> a)K(Me <sub>3</sub> )STGGKAPRKQL-K(Biot)-NH <sub>2</sub>                                | H3K4me3 + R8me2a + K9me3                       |
| P99         | H4 11–27      | Ac-GKGGAKRHRKVLRLDNIQ-Peg-Biot                                                                                                     | H4 (11–27)                                     |
| P100        | H3 74–84      | Ac-IAQDFKTDLRF-Peg-K(Biot)-NH <sub>2</sub>                                                                                         | H3 (74–84) <i>N</i> -ac                        |
| P101        | H3 74–84      | Ac-IAQDFK(Me <sub>3</sub> )TDLRF-Peg-K(Biot)-NH <sub>2</sub>                                                                       | H3K79me3                                       |
| P102        | H3 74–84      | Ac-IAQDFK(Me <sub>2</sub> )TDLRF-Peg-K(Biot)-NH <sub>2</sub>                                                                       | H3K79me2                                       |
| P103        | H3 74–84      | Ac-IAQDFK(Me)TDLRF-Peg-K(Biot)-NH <sub>2</sub>                                                                                     | H3K79me1                                       |
| P104        | H3 74–84      | IAQDFKTDLRF-Peg-K(Biot)-NH <sub>2</sub>                                                                                            | H3 (74–84)                                     |
| P120        | H3 27–45      | KSAPSTGGVKK(Me <sub>3</sub> )KPHRYKPGT-GG-K(Biot)-NH <sub>2</sub>                                                                  | H3K36me3 (27–45)                               |
| P121        | H3 27–45      | KSAPSTGGVKK(Me <sub>2</sub> )KPHRYKPGT-GG-K(Biot)-NH <sub>2</sub>                                                                  | H3K36me2 (27–45)                               |
| P123        | H3 27–45      | KSAPSTGGVKK(Ac)KPHRYKPGT-GG-K(Biot)-NH <sub>2</sub>                                                                                | H3K36ac (27–45)                                |
| P124        | H3 27–45      | KSAPSTGGVKKPHRYKPGT-GG-K(Biot)-NH <sub>2</sub>                                                                                     | H3 (27–45)                                     |
| P125        | H3 1–20       | ARpTKQTARKSTGGKAPRKQL-K(Biot)-NH <sub>2</sub>                                                                                      | H3T3p                                          |
| P129        | H3 6–30       | Ac-TARK(Me <sub>2</sub> )STGGKAPRKQLATKAARK(Me <sub>2</sub> )SAP-Peg-K(Biot)-NH <sub>2</sub>                                       | H3K9me2 + K27me2                               |
| P132        | H3 1–20       | ARTK(Me <sub>3</sub> )QTARK(Me <sub>3</sub> )STGGKAPRKQL-K(Biot)-NH <sub>2</sub>                                                   | H3K4me3 + K9me3                                |
| P133        | H3 1–20       | ARTKQTARK(Me <sub>2</sub> )STGGKAPRKQL-K(Biot)-NH <sub>2</sub>                                                                     | H3K9me2                                        |
| P134        | H3 1–20       | ARTKQTARK(Me)STGGKAPRKQL-K(Biot)-NH <sub>2</sub>                                                                                   | H3K9me1                                        |
| P137        | H3 1–20       | ARTKQTARKSTGGKAPRK(Me <sub>3</sub> )QL-K(Biot)-NH <sub>2</sub>                                                                     | H3K18me3                                       |
| P138        | H3 1–20       | ARTKQTARKSTGGKAPRK(Me <sub>2</sub> )QL-K(Biot)-NH <sub>2</sub>                                                                     | H3K18me2                                       |
| P139        | H3 1–20       | ARTKQTARKSTGGKAPRK(Me)QL-K(Biot)-NH <sub>2</sub>                                                                                   | H3K18me1                                       |
| P144        | H3 1–20       | ARTKQTARK(Ac)pSTGGKAPRKQL-K(Biot)-NH <sub>2</sub>                                                                                  | H3K9ac + S10p                                  |
| P145        | H3 1–20       | ARTKQTARK(Me <sub>3</sub> )pSTGGKAPRKQL-K(Biot)-NH <sub>2</sub>                                                                    | H3K9me3 + S10p                                 |
| P146        | H3 1–20       | ARTKQTARK(Me <sub>2</sub> )pSTGGKAPRKQL-K(Biot)-NH <sub>2</sub>                                                                    | H3K9me2 + S10p                                 |
| P147        | H3 1–20       | ARTKQTARK(Me)pSTGGKAPRKQL-K(Biot)-NH <sub>2</sub>                                                                                  | H3K9me1 + S10p                                 |
| P148        | H3 1–20       | ARTK(Me <sub>3</sub> )QTARK(Ac)pSTGGKAPRKQL-K(Biot)-NH <sub>2</sub>                                                                | H3K4me3 + K9ac + S10p                          |
| P149        | H3 1–22       | ARTKQTARKSTGGKAPRK(Me <sub>2</sub> a)KQLAT-K(Biot)-NH <sub>2</sub>                                                                 | H3R17me2a                                      |
| P150        | H3 1–22       | ARTKQTARKSTGGKAPRK(Me <sub>2</sub> s)KQLAT-K(Biot)-NH <sub>2</sub>                                                                 | H3R17me2s                                      |
| P151        | H3 1–22       | ARTKQTARKSTGGKAPRK(Me)KQLAT-K(Biot)-NH <sub>2</sub>                                                                                | H3R17me1                                       |
| P157        | H3 1–20       | AR(Me <sub>2</sub> s)TK(Me <sub>3</sub> )QTARKSTGGKAPRKQL-K(Biot)-NH <sub>2</sub>                                                  | H3R2me2s + K4me3                               |
| P162        | H3 1–20       | ARTKQpTARKSTGGKAPRKQL-K(Biot)-NH <sub>2</sub>                                                                                      | H3T6p                                          |
| P163        | H3 1–20       | ARTK(Me <sub>3</sub> )QpTARKSTGGKAPRKQL-K(Biot)-NH <sub>2</sub>                                                                    | H3K4me3 + T6p                                  |
| P164        | H3 1–20       | ARTK(Me <sub>2</sub> )QpTARKSTGGKAPRKQL-K(Biot)-NH <sub>2</sub>                                                                    | H3K4me2 + T6p                                  |
| P165        | H3 1–20       | ARTKQpTARK(Ac)STGGK(Ac)APRK(Ac)QL-K(Biot)-NH <sub>2</sub>                                                                          | H3T6p + K9ac + K14ac + K18ac                   |
| P166        | H3 1–20       | ARTK(Me <sub>3</sub> )QpTARK(Ac)STGGK(Ac)APRK(Ac)QL-K(Biot)-NH <sub>2</sub>                                                        | H3K4me3 + T6p + K9ac + K14ac + K18ac           |
| P167        | H3 1–20       | ARTK(Me <sub>2</sub> )QpTARK(Ac)STGGK(Ac)APRK(Ac)QL-K(Biot)-NH <sub>2</sub>                                                        | H3K4me2 + T6p + K9ac + K14ac + K18ac           |



Table S2. Cont.

| Peptide no. | Residue range | Sequence                                                                                                           | Annotation                                     |
|-------------|---------------|--------------------------------------------------------------------------------------------------------------------|------------------------------------------------|
| P174        | H3 1–20       | AR(Me <sub>2</sub> s)TK(Me <sub>3</sub> )QTARK(Ac)STGGK(Ac)APRK(Ac)QL-K(Biot)-NH <sub>2</sub>                      | H3R2me2s + K4me3 + K9ac + K14ac + K18ac        |
| P178        | H3 1–20       | ARTKQTAR(Me)K(Me <sub>3</sub> )STGGKAPRKQL-K(Biot)-NH <sub>2</sub>                                                 | H3R8me1 + K9me3                                |
| P179        | H3 1–20       | ARTKQTAR(Me)K(Me <sub>2</sub> )STGGKAPRKQL-K(Biot)-NH <sub>2</sub>                                                 | H3R8me1 + K9me2                                |
| P180        | H3 1–20       | ARTKQTAR(Me <sub>2</sub> a)K(Me <sub>3</sub> )STGGKAPRKQL-K(Biot)-NH <sub>2</sub>                                  | H3R8me2a + K9me3                               |
| P181        | H3 1–20       | ARTKQTAR(Me <sub>2</sub> a)K(Me <sub>2</sub> )STGGKAPRKQL-K(Biot)-NH <sub>2</sub>                                  | H3R8me2a + K9me2                               |
| P182        | H3 1–20       | ARTKQTAR(Me <sub>2</sub> a)K(Me)STGGKAPRKQL-K(Biot)-NH <sub>2</sub>                                                | H3R8me2a + K9me1                               |
| P183        | H3 1–20       | ARTKQTAR(Me <sub>2</sub> s)K(Me <sub>3</sub> )STGGKAPRKQL-K(Biot)-NH <sub>2</sub>                                  | H3R8me2s + K9me3                               |
| P184        | H3 1–20       | ARTKQTAR(Me <sub>2</sub> s)K(Me <sub>2</sub> )STGGKAPRKQL-K(Biot)-NH <sub>2</sub>                                  | H3R8me2s + K9me2                               |
| P185        | H3 1–20       | ARTKQTAR(Me <sub>2</sub> s)K(Me)STGGKAPRKQL-K(Biot)-NH <sub>2</sub>                                                | H3R8me2s + K9me1                               |
| P186        | H3 1–20       | ARTK(Ac)QTARK(Me <sub>2</sub> )STGGK(Ac)APRK(Ac)QL-K(Biot)-NH <sub>2</sub>                                         | H3K4ac + K9me2 + K14ac + K18ac                 |
| P187        | H3 1–20       | ARTK(Ac)QTARK(Me)STGGK(Ac)APRK(Ac)QL-K(Biot)-NH <sub>2</sub>                                                       | H3K4ac + K9me1 + K14ac + K18ac                 |
| P195        | H3 15–34      | Ac-APRK <sup>18</sup> QLATK <sup>23</sup> AARK(Me <sub>3</sub> ) <sup>27</sup> SAPSTGG-Peg-Biot                    | H3K27me3                                       |
| P196        | H3 15–34      | Ac-APRK <sup>18</sup> QLATK <sup>23</sup> AARK(Me <sub>2</sub> ) <sup>27</sup> SAPSTGG-Peg-Biot                    | H3K27me2                                       |
| P197        | H3 15–34      | Ac-APRK <sup>18</sup> QLATK <sup>23</sup> AARK(Me) <sup>27</sup> SAPSTGG-Peg-Biot                                  | H3K27me1                                       |
| P198        | H3 15–34      | Ac-APRK <sup>18</sup> QLATK <sup>23</sup> AAR(Me <sub>2</sub> a)K(Me <sub>3</sub> ) <sup>27</sup> SAPSTGG-Peg-Biot | H3R26me2a + K27me3                             |
| P200        | H3 15–34      | Ac-APRK <sup>18</sup> QLATK <sup>23</sup> AARR(Me <sub>2</sub> a)K(Me) <sup>27</sup> SAPSTGG-Peg-Biot              | H3R26me2a + K27me1                             |
| P220        | H3 1–20       | ARTKQpTARK(Me <sub>3</sub> )STGGKAPRKQL-K(Biot)-NH <sub>2</sub>                                                    | H3T6p + K9me3                                  |
| P221        | H3 1–20       | ARTKQpTAR(Me <sub>2</sub> a)K(Me <sub>3</sub> )STGGKAPRKQL-K(Biot)-NH <sub>2</sub>                                 | H3T6p + R8me2a + K9me3                         |
| P224        | H3 15–34      | Ac-APRK <sup>18</sup> QLATK <sup>23</sup> AAR(Me <sub>2</sub> a)K <sup>27</sup> SAPSTGG-Peg-Biot                   | H3R26me2a                                      |
| P225        | H3 15–34      | Ac-APRK <sup>18</sup> QLATK <sup>23</sup> AARK(Me <sub>3</sub> ) <sup>27</sup> pSAPSTGG-Peg-Biot                   | H3K27me3 + S28p                                |
| P226        | H3 15–34      | Ac-APRK <sup>18</sup> QLATK <sup>23</sup> AARK(Me <sub>2</sub> ) <sup>27</sup> pSAPSTGG-Peg-Biot                   | H3S27me2 + S28p                                |
| P229        | H3 1–20       | ARTK(Ac)QTARK(Me <sub>3</sub> )STGGKAPRKQL-K(Biot)-NH <sub>2</sub>                                                 | H3K4ac + K9me3                                 |
| P237        | H3 1–32       | ARTKQTARK(Me <sub>2</sub> )STGGKAPRKQLATKAARKSAPAT-Peg-Biot                                                        | H3K9me2 (1–32)                                 |
| P241        | H3 15–34      | Ac-APRK <sup>18</sup> QLATK <sup>23</sup> AARK(Ac) <sup>27</sup> SAPSTGG-Peg-Biot                                  | H3K27ac                                        |
| P242        | H3 15–34      | Ac-APRK <sup>18</sup> QLATK <sup>23</sup> AARK(Ac) <sup>27</sup> pSAPSTGG-Peg-K(Biot)-NH <sub>2</sub>              | H3K27ac + S28p                                 |
| P243        | H3 15–34      | Ac-APRK <sup>18</sup> QLATK <sup>23</sup> AARK <sup>27</sup> pSAPSTGG-Peg-K(Biot)-NH <sub>2</sub>                  | H3S28p                                         |
| P253        | H3 52–61      | Ac-RRYQK <sup>56</sup> STELL-Peg-Biot                                                                              | H3 (52–61)                                     |
| P254        | H3 52–61      | Ac-RRYQK(Ac)STELL-Peg-Biot                                                                                         | H3K56ac (52–61)                                |
| P255        | H3 52–61      | Ac-RRYQK(Me <sub>3</sub> )STELL-Peg-Biot                                                                           | H3K56me3 (52–61)                               |
| P259        | H3 1–15       | ARTK(Me <sub>2</sub> )QTARK(Me <sub>2</sub> )STGGKA-Peg-Biot                                                       | H3K4me2 + K9me2                                |
| P260        | H3 1–15       | ARTK(Me)QTARK(Me <sub>2</sub> )STGGKA-Peg-Biot                                                                     | H3K4me1 + K9me2                                |
| P264        | H3 1–15       | ARTK(Me <sub>3</sub> )QTARK(Me <sub>2</sub> )STGGKA-Peg-Biot                                                       | H3K4me3 + K9me2                                |
| P300        | H2A 1–17      | Ac-SGRGKQGGKARAKAKTR-Peg-Biot                                                                                      | H2A (1–17)                                     |
| P301        | H2A 1–17      | Ac-SGRGK(Ac)QGGK(Ac)ARAK(Ac)AK(AC)TR-Peg-Biot                                                                      | H2AK5ac + K9ac + K13ac + K15ac                 |
| P302        | H2A 1–17      | Ac-SGRGK(Ac)QGGKARAKAKTR-Peg-Biot                                                                                  | H2AK5ac                                        |
| P303        | H2A 1–17      | Ac-pSGRGK(Ac)QGGKARAKAKTR-Peg-Biot                                                                                 | H2AS1p + K5ac                                  |
| P304        | H2A 1–17      | Ac-SGR(Me <sub>2</sub> a)GK(Ac)QGGKARAKAKTR-Peg-Biot                                                               | H2AR3me2a + K5ac                               |
| P305        | H2A 1–17      | Ac-pSGR(Me <sub>2</sub> a)GK(Ac)QGGKARAKAKTR-Peg-Biot                                                              | H2AS1p + R3me2a + K5ac                         |
| P306        | H2A 1–17      | Ac-SGCitGK(Ac)QGGKARAKAKTR-Peg-Biot                                                                                | H2ACit3 + K5ac                                 |
| P307        | H2A 1–17      | Ac-pSGCitGK(Ac)QGGKARAKAKTR-Peg-Biot                                                                               | H2AS1p + Cit3 + K5ac                           |
| P308        | H2A 1–17      | Ac-pSGRGK(Ac)QGGK(Ac)ARAK(Ac)AK(AC)TR-Peg-Biot                                                                     | H2AS1p + K5ac + K9ac + K13ac + K15ac           |
| P309        | H2A 1–17      | SGRGK(Ac)QGGK(Ac)ARAK(Ac)AK(AC)TR-Peg-Biot                                                                         | H2AK5ac + K9ac + K13ac + K15ac (no N-ac)       |
| P310        | H2A 1–17      | pSGRGK(Ac)QGGK(Ac)ARAK(Ac)AK(AC)TR-Peg-Biot                                                                        | H2AS1p + K5ac + K9ac + K13ac + K15ac (no N-ac) |
| P311        | H2A.X         | Biot-Peg-G <sup>132</sup> KKATQAS <sup>139</sup> QEY <sup>142</sup> -OH                                            | H2AX (132–142)                                 |
| P312        | H2A.X         | Biot-Peg-G <sup>132</sup> KKATQAp <sup>139</sup> QEY <sup>142</sup> -OH                                            | H2AX (S139p)                                   |
| P350        | H4 1–23       | Ac-SGR(Me <sub>2</sub> a)GK(Ac)GGKGLGKGGAKRHRKVLR-K(Biot)-NH <sub>2</sub>                                          | H4R3me2a + K5ac                                |
| P351        | H4 1–23       | SGRGKGGKGLGKGGAKRHRKVLR-Peg-Biot                                                                                   | H4 (1–23) (no N-ac)                            |
| P352        | H4 1–23       | Ac-SGRGKGGKGLGKGGAKRHRK(Ac)VLRp-Peg-Biot                                                                           | H4K20ac                                        |
| P353        | H4 1–23       | Ac-pSGRGK(Ac)GGK(Ac)GLGK(Ac)GGAK(Ac)RHRKVLR-Peg-Biot                                                               | H4S1p + K5ac + K8ac + K12ac + K16ac            |
| P359        | H4 1–23       | Ac-SGRGK(Ac)GGK(Ac)GLGKGGAKRHRKVLR-Peg-Biot                                                                        | H4K5ac + K8ac                                  |
| P360        | H4 1–23       | Ac-SGRGK(Ac)GGKGLGKGGAK(Ac)RHRKVLR-Peg-Biot                                                                        | H4K5ac + K16ac                                 |
| P362        | H4 1–23       | Ac-SGRGKGGK(Ac)GLGK(Ac)GGAKRHRKVLR-Peg-Biot                                                                        | H4K8ac + K12ac                                 |
| P363        | H4 1–23       | Ac-SGRGKGGK(Ac)GLGKGGAKRHRK(Ac)VLR-Peg-Biot                                                                        | H4K12ac + K16ac                                |
| P366        | H4 1–23       | Ac-SGRGKGGKGLGKGGAK(Ac)RHRK(Ac)VLR-Peg-Biot                                                                        | H4K16ac + K20ac                                |
| P370        | H4 1–23       | Ac-SGRGQGGQLGK(Ac)GGAQRHRQVLR-Peg-Biot                                                                             | H4K12ac + KQ5,8,16,20                          |
| P371        | H4 1–23       | Ac-SGRGK(Me)GGKGLGKGGAKRHRKVLR-Peg-Biot                                                                            | H4K5me1                                        |
| P372        | H4 1–23       | Ac-SGRGKGGK(Me)GLGKGGAKRHRKVLR-Peg-Biot                                                                            | H4K8me1                                        |
| P373        | H4 1–23       | Ac-SGRGKGGKGLGK(Me)GGAKRHRKVLR-Peg-Biot                                                                            | H4K12me1                                       |
| P374        | H4 1–23       | Ac-SGRGK(Ac)GGK(Me)GLGK(Ac)GGAKRHRKVLR-Peg-Biot                                                                    | H4K5ac + K8me1 + K12ac                         |
| P375        | H4 1–23       | Ac-SGRGK(Me)GGK(Ac)GLGK(Me)GGAKRHRKVLR-Peg-Biot                                                                    | H4K5me1 + K8ac + K12me1                        |
| P376        | H4 1–23       | Ac-SGRGK(Me)GGK(Me)GLGK(Me)GGAKRHRKVLR-Peg-Biot                                                                    | H4K5me1 + K8me1 + K12me1                       |
